# Supplementary material for: Dietary Lactobacillus rhamnosus GG extracellular vesicles enhance antiprogrammed cell death 1 (anti-PD-1) immunotherapy efficacy against colorectal cancer
Source: Royal Society of Chemistry journal article supplement (doi:10.1039/d3fo02018e), 2023-01-01
Supplement: d3fo02018e1.pdf [file d3fo02018e1.pdf]

## Supplementary Information for

### **Dietary *Lactobacillus rhamnosus* GG extracellular vesicles enhance anti-PD-1 immunotherapy efficacy against colorectal cancer**

Shun Lu<sup>a</sup>, Jing Xu<sup>a</sup>, Zihao Zhao<sup>a</sup>, Yuheng Guo<sup>a</sup>, Hanwen Zhang<sup>a</sup>, Peter W. Jurutka<sup>b</sup>, Dechun Huang<sup>c</sup>, Chongjiang Cao<sup>a</sup>, Shujie Cheng<sup>a\*</sup>

<sup>a</sup> *Department of Food Nutrition and Safety/National R&D Center for Chinese Herbal Medicine Processing, School of Engineering, China Pharmaceutical University, Nanjing 211198, P. R. China;*

<sup>b</sup> *School of Mathematical and Natural Sciences, Arizona State University, AZ 85306, USA;*

<sup>c</sup> *Department of Pharmaceutical Engineering, School of Engineering, China Pharmaceutical University, Nanjing 211198, P. R. China*

\*Corresponding Author: Shujie Cheng

E-mail address: scheng@cpu.edu.cn

Tel: +8618551726017

Department of Food Nutrition and Safety, School of Engineering, China Pharmaceutical University, Nanjing 211198, China

## Supplementary figures

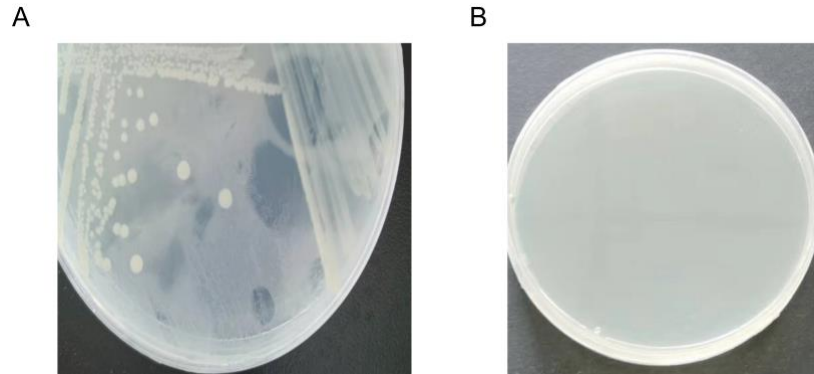

**Figure S1.** The extracellular vesicles of *Lactobacillus rhamnosus* ATCC 53103 did not contain viable organisms. The delineated colonies on LB solid medium and the extracted LGG-EV were almost free of colonies on solid medium before liquid culture. (A). Colony characteristics of *Lactobacillus rhamnosus* ATCC 53103 cultured in LB solid medium for 24h. (B). Almost no colonies were produced after 100ul of LGG-EV were taken and incubated in solid LB medium coated for 48h.

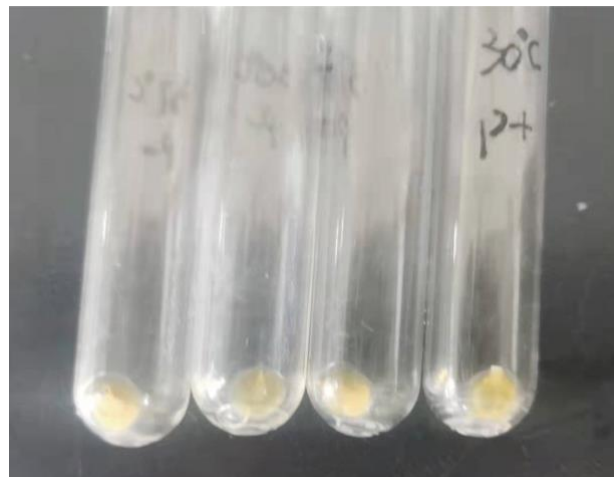

**Figure S2.** LGG-EV precipitates obtained after ultra-high speed centrifugation of medium supernatants from different culture conditions. Pictures of LGG-EV precipitates after centrifugation at 150,000g for 2h at 37°C/30°C and supernatant of medium without/with PenG addition.

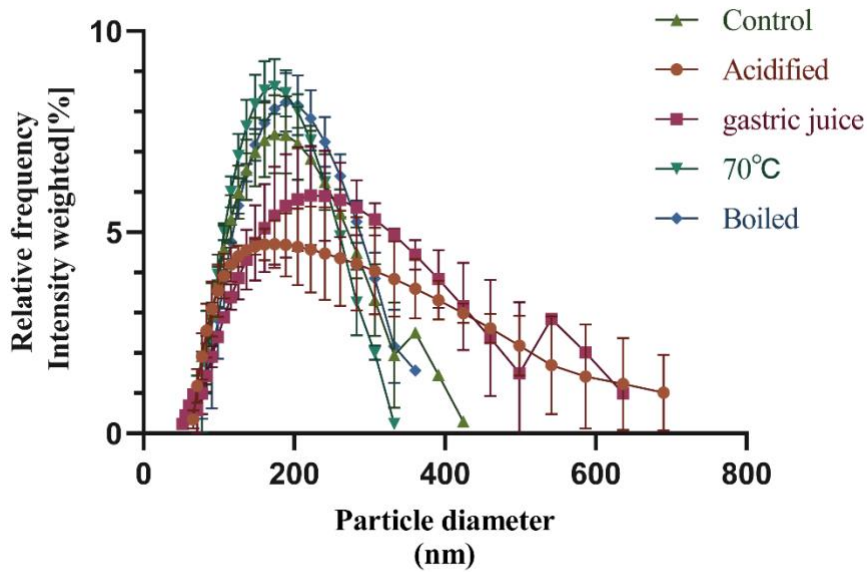

Figure S3. Vesicle particle size distribution after treatment with different extreme conditions. Re-centrifuged LGG-EVs were collected and measured after *in vitro* treatment under acidic conditions (pH=2) and high temperature.

Marker Control Acidified Gastric 70°C Boiled  
juice

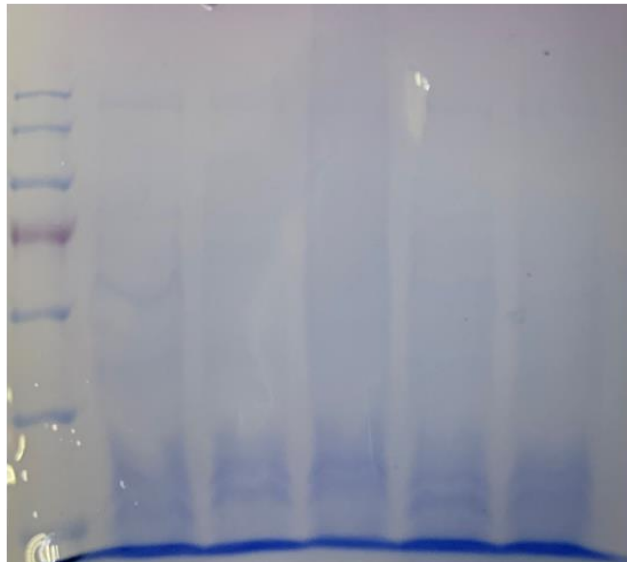

Figure S4. Photographs of the bands of SDS-PAGE movies of LGG-EV before lysis indirectly verified that the proteins within LGG-EV were not released prior to lysis. After *in vitro* treatment with acidic conditions (pH=2) and high temperature, re-centrifuged LGG-EV were collected, sampled at 50ug per well after SDS-PAGE electrophoresis and photographed.

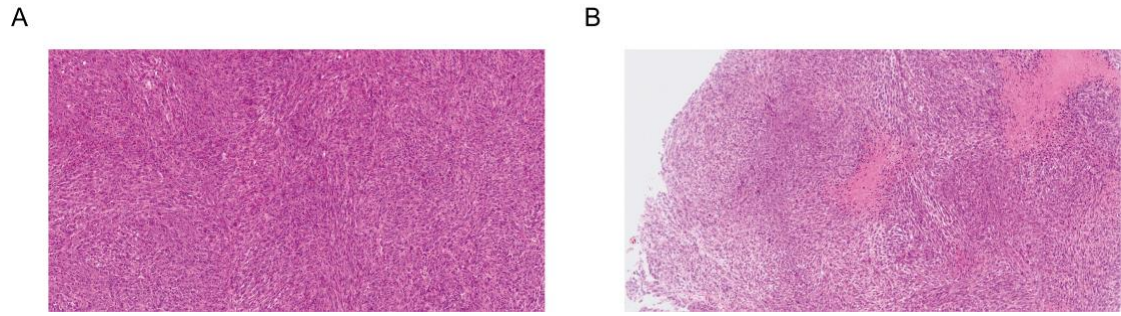

**Figure S5.** H&E staining images also clarified the expansion of necrotic regions in tumor tissue after treatment with LGG-EV, illustrating LGG-EV against tumor growth. Typical H&E staining images of tumor of control group(A) and LGG-EV treated(B).

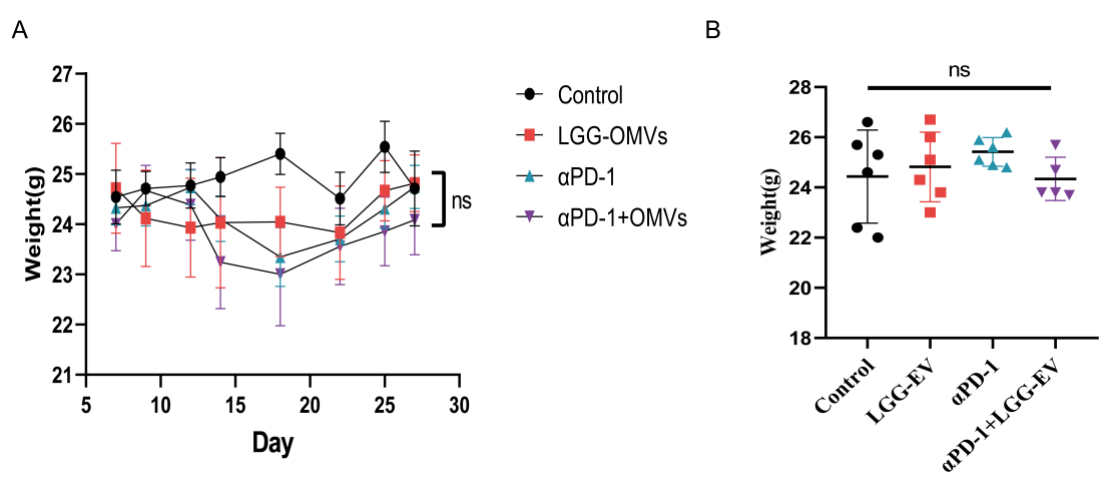

**Figure S6.** No significant changes in body weight of mice after LGG-EV and PD-1 administration. (A). Body weight curves of the four groups of mice. (B). Body weight of mice in each group after day 28. All data are presented as the means  $\pm$  SEM. P-value < 0.05, not significant

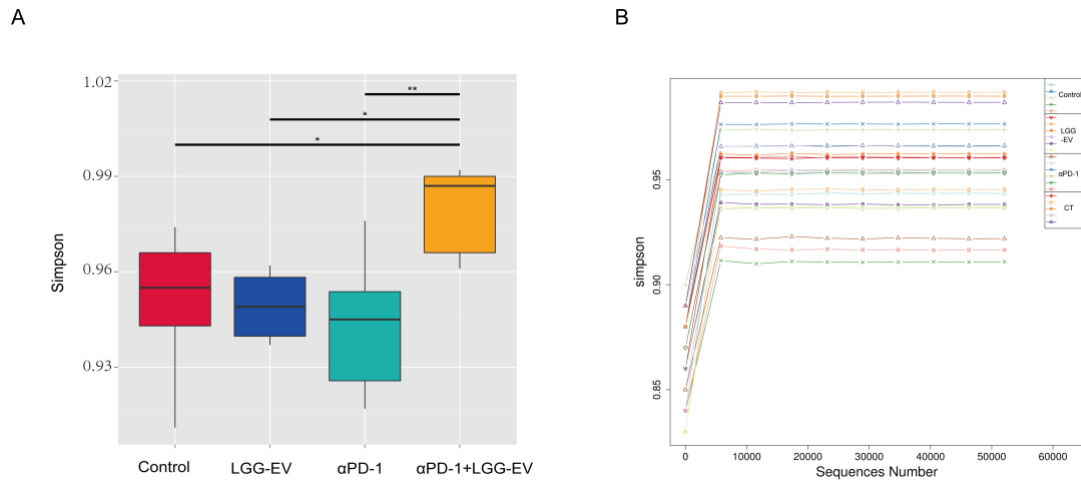

**Figure S7. Increase in Simpson's index of flora diversity after co-administration. (A). Simpson's index of flora among the four groups. (B). Simpson curve of all samples.**

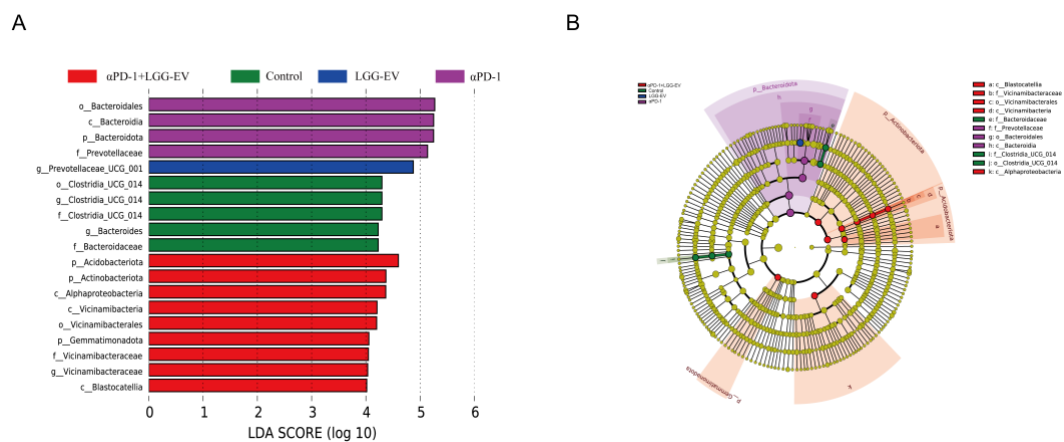

**Figure S8. LEfSe analysis for differential abundant taxa of four groups. (A). Histogram of the distribution of LDA values. Threshold parameters were set as  $p=0.05$  for the Mann-Whitney U test and multiclass analysis=all against all. LDA score  $>4.0$ . (B). Evolutionary branching diagram of differential taxa.**

**Table S1. Specific information and dilution ratios of antibodies used in flow cytometry. All antibodies were validated by the manufacturers and by extensive applications in published studies.**

| <b>Antibody</b>      | <b>Clone</b> | <b>Fluorescence channel</b> | <b>Company</b> | <b>Proportion</b> |
|----------------------|--------------|-----------------------------|----------------|-------------------|
| <b>CD3</b>           | 17A2         | Alexa Fluor 647             | Biolegend      | 1:200             |
| <b>CD8</b>           | 53-6.7       | PE                          | Biolegend      | 1:200             |
| <b>CD4</b>           | GK1.5        | PerCP                       | Biolegend      | 1:200             |
| <b>I-A/I-E</b>       | M5/114.15.2  | Alexa Fluor 488             | Biolegend      | 1:200             |
| <b>CD11c</b>         | N418         | PE-Cy7                      | Biolegend      | 1:200             |
| <b>CD11b</b>         | M1/70        | APC-Cy7                     | Biolegend      | 1:200             |
| <b>CD16/32</b>       | 93           | Non-conjugated              | Biolegend      | 1:300             |
| <b>Zombie Violet</b> | -            | BV421                       | Biolegend      | 1:300             |
